# Supplementary material for: Remarkable effect of π-skeleton conformation in finitely conjugated polymer semiconductors
Source: Royal Society of Chemistry journal article supplement (doi:10.1039/d0tc01303j), 2020-01-01

## Supporting Information

for

# **Remarkable effect of $\pi$ -skeleton conformation in finitely conjugated polymer semiconductors**

Zhihui Chen,<sup>ab</sup> Weifeng Zhang,<sup>\*a</sup> Yankai Zhou,<sup>ab</sup> Xuyang Wei,<sup>ab</sup> Chenyu Li,<sup>ab</sup> Liping Wang<sup>c</sup> and Gui Yu<sup>\*ab</sup>

<sup>a</sup> *Beijing National Laboratory for Molecular Sciences, CAS Research/Education Center for Excellence in Molecular Sciences, Institute of Chemistry, Chinese Academy of Sciences, Beijing 100190, P. R. China*

<sup>b</sup> *School of Chemical Sciences, University of Chinese Academy of Sciences, Beijing 100049, P. R. China*

<sup>c</sup> *School of Materials Science and Engineering, University of Science and Technology Beijing, Beijing 100083, P. R. China*

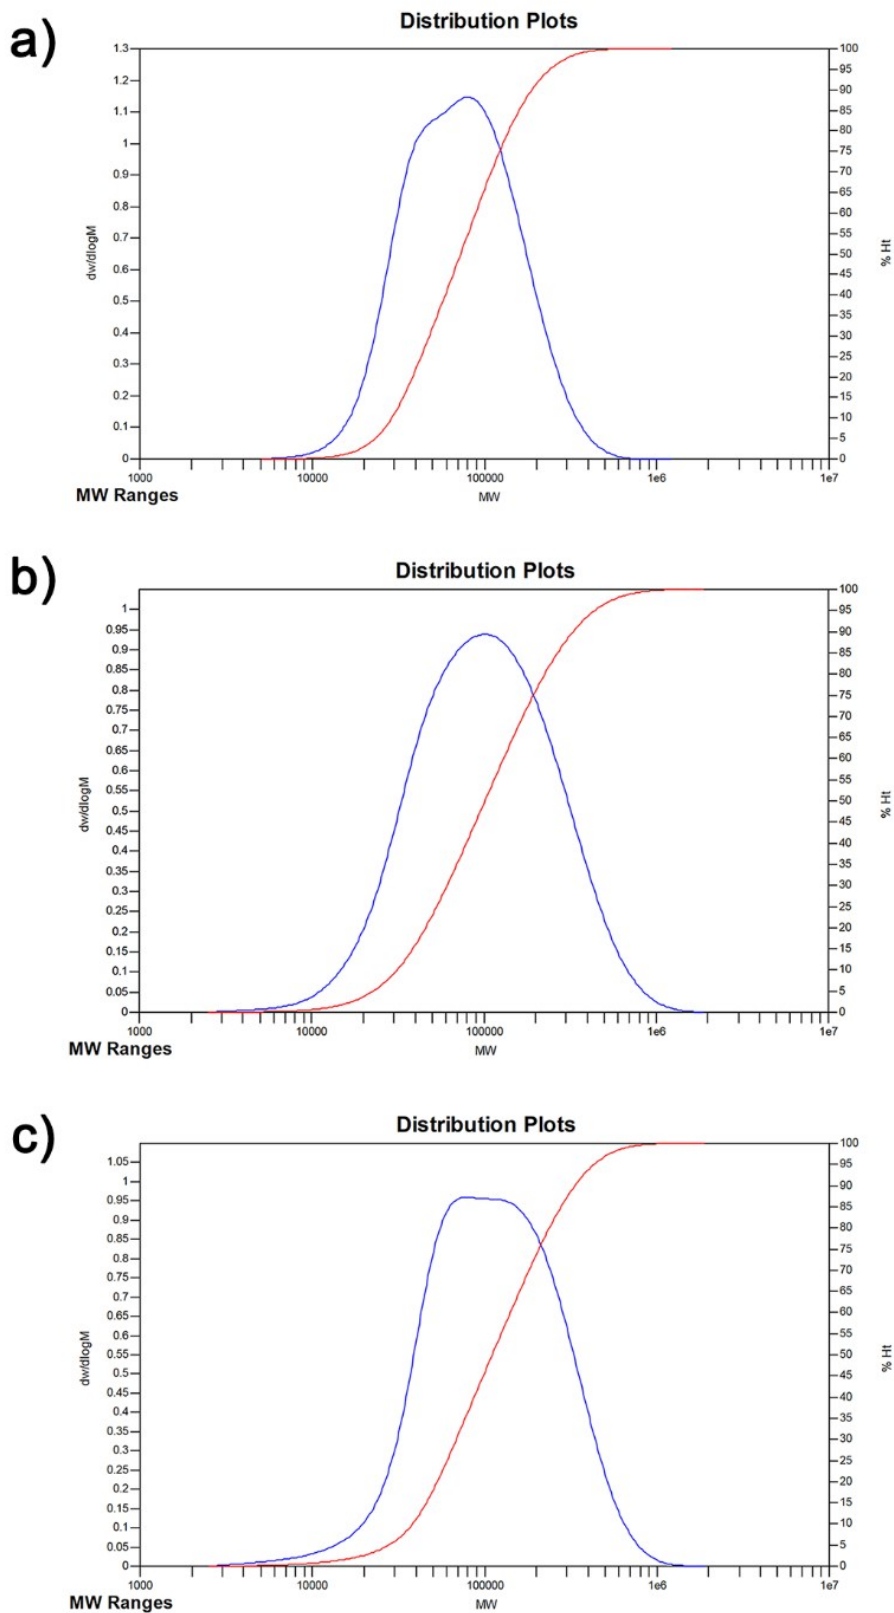

**Fig. S1** High-temperature gel permeation chromatography (HT-GPC) plots of the TFE-containing finitely conjugated polymers, (a) **PNBDO-T**, (b) **PNBDO-BiT**, and (c) **PNBDO-TriT**.

**Table S1** Molecular weight and distribution of the TFE-containing finitely conjugated polymers<sup>a)</sup>

|                   | $M_p$  | $M_n$ | $M_v$  | $M_w$  | $M_z$  | $M_{z+1}$ | $\bar{D}$ |
|-------------------|--------|-------|--------|--------|--------|-----------|-----------|
| <b>PNBDO-T</b>    | 80484  | 55914 | 86495  | 93335  | 150074 | 219256    | 1.6693    |
| <b>PNBDO-BiT</b>  | 102766 | 65227 | 131983 | 147906 | 291618 | 475939    | 2.2676    |
| <b>PNBDO-TriT</b> | 78540  | 72664 | 139389 | 153873 | 276069 | 420239    | 2.1176    |

<sup>a)</sup> GPC versus polystyrene standards in 1,2,4-trichlorobenzene at 150 °C.

**Table S2** UPS spectra parameters of polymer thin films<sup>a)</sup>

| polymer           | $E_{cutoff}$ (eV) | $E_{H,onset}$ (eV) | IP (eV) |
|-------------------|-------------------|--------------------|---------|
| <b>PNBDO-T</b>    | 16.93             | 1.60               | 5.89    |
| <b>PNBDO-BiT</b>  | 16.89             | 1.49               | 5.82    |
| <b>PNBDO-TriT</b> | 16.94             | 1.36               | 5.62    |

<sup>a)</sup>  $IP = h\nu - (E_{cutoff} - E_{H,onset})$ ,  $h\nu = 21.22$  eV.

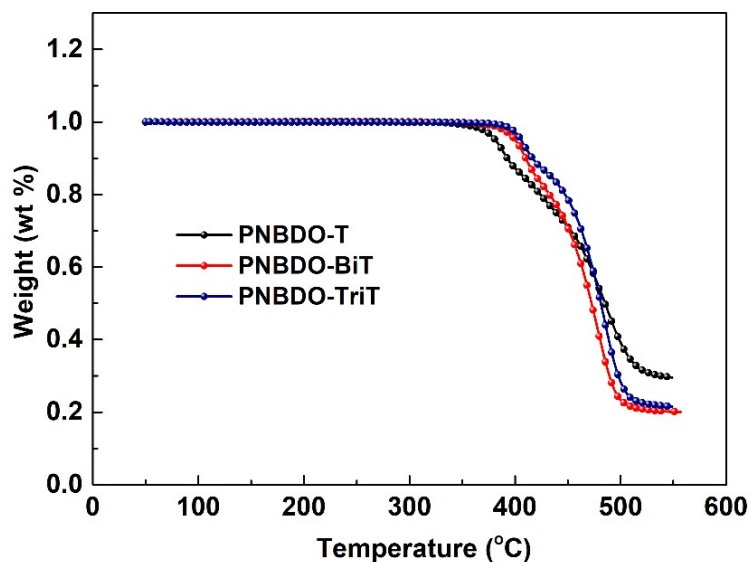

**Fig. S2** TGA traces of the TFE-containing finitely conjugated polymers, **PNBDO-T**, **PNBDO-BiT**, and **PNBDO-TriT**.

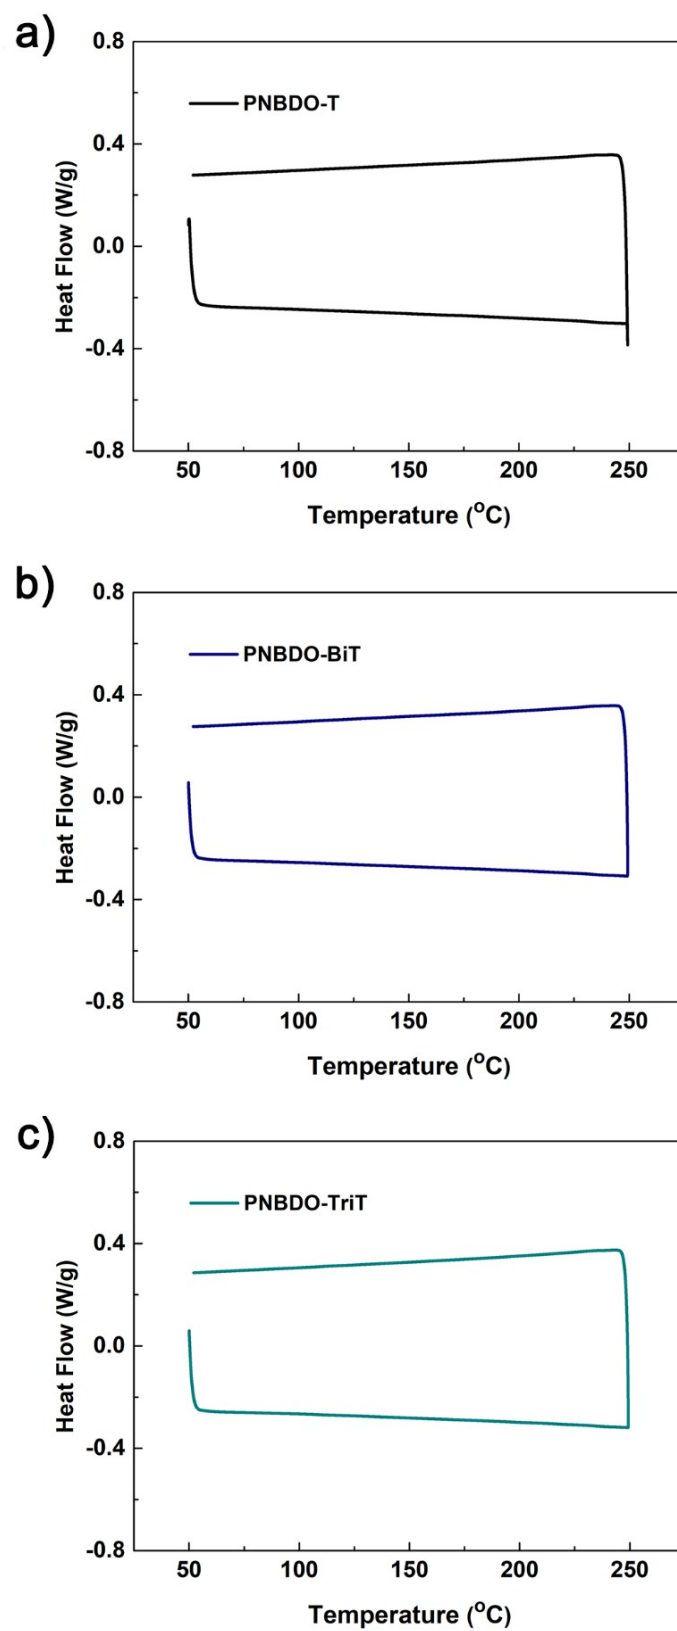

**Fig. S3** DSC curves of the TFE-containing finitely conjugated polymers, (a) **PNBDO-T**, (b) **PNBDO-BiT**, and (c) **PNBDO-TriT**.

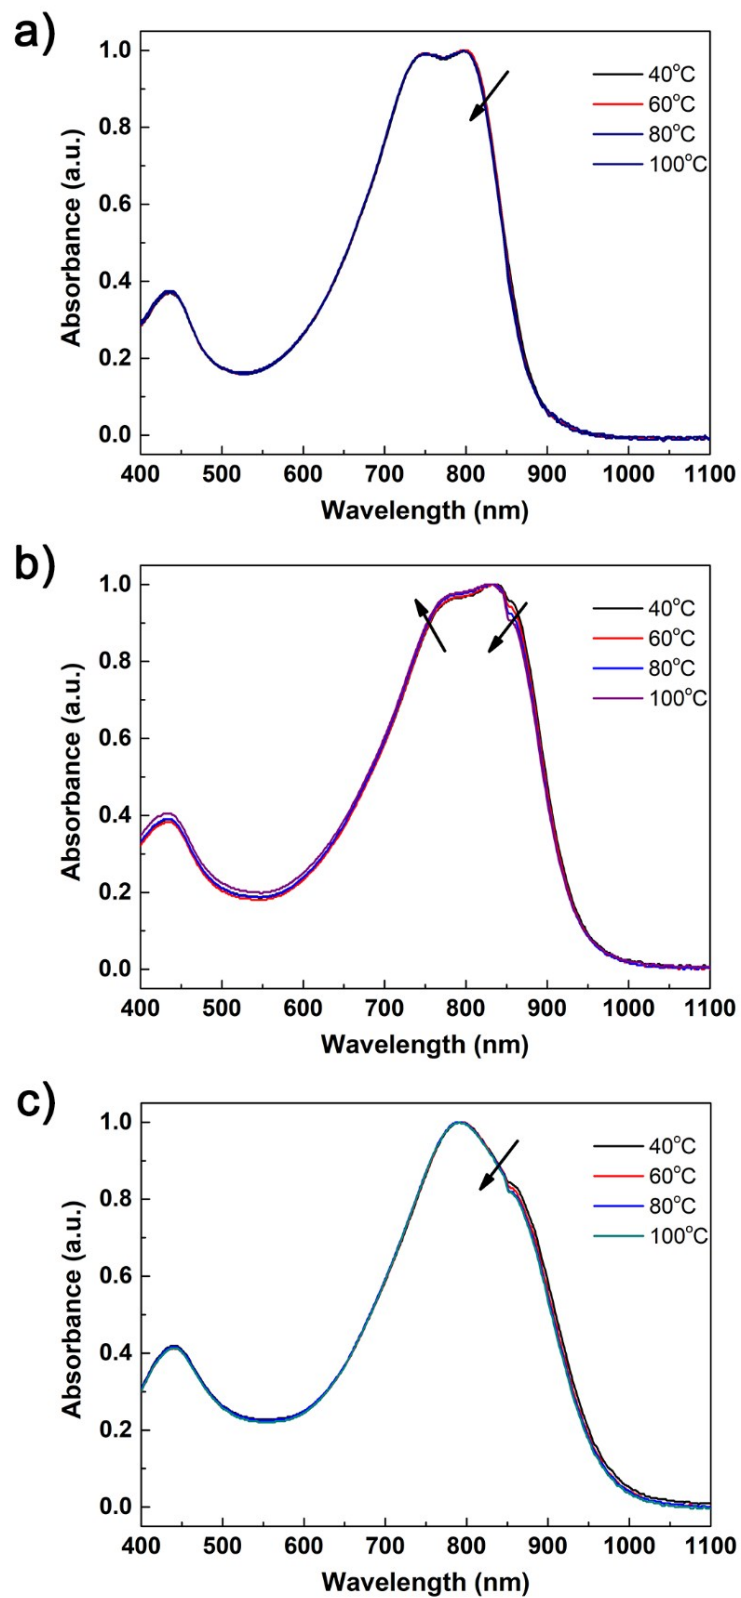

**Fig. S4** Temperature-dependent absorption profiles of the TFE-containing finitely conjugated polymers, (a) PNBDO-T, (b) PNBDO-BiT, and (c) PNBDO-TriT, in dilute chlorobenzene solution.

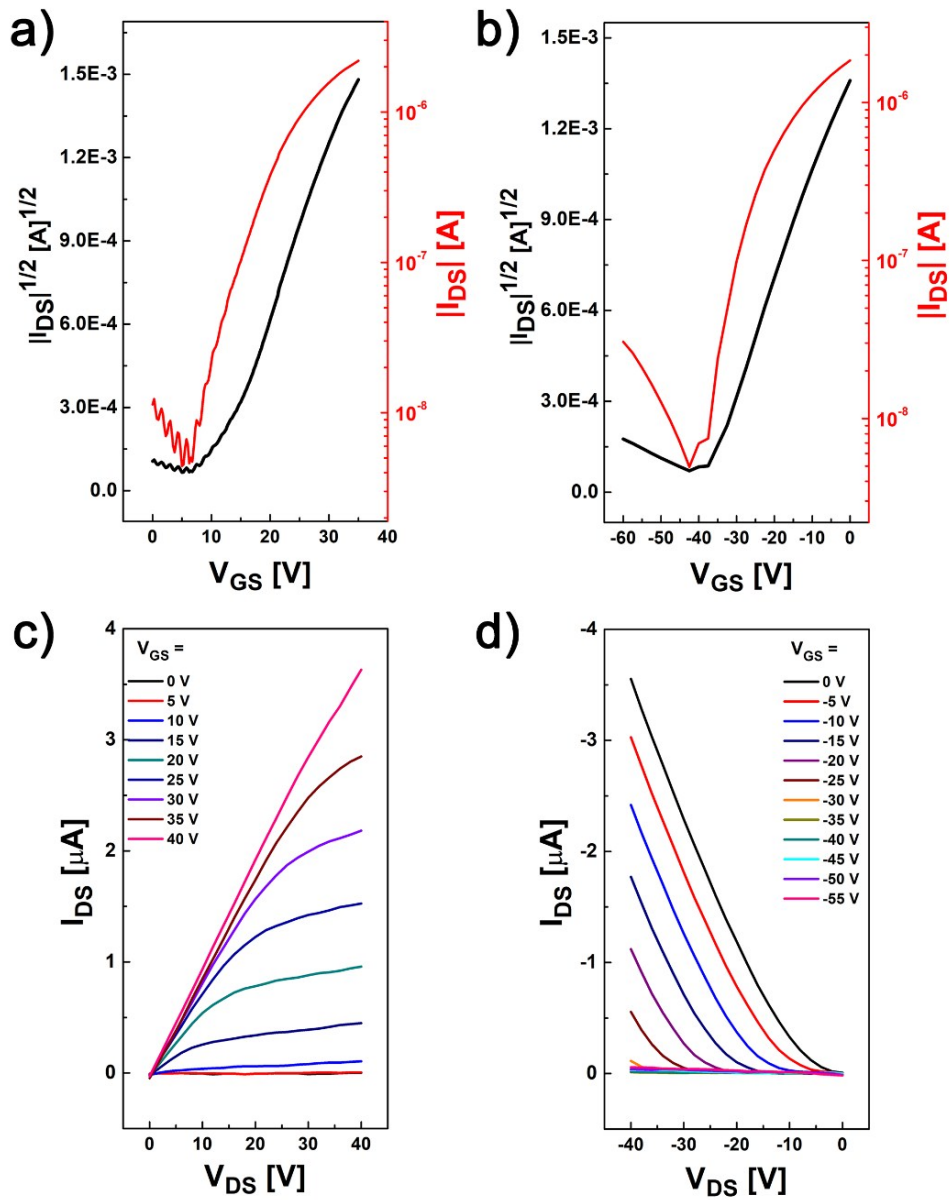

**Fig. S5** Transfer characteristics ( $V_{DS} = -40$  and  $40\text{V}$ ) and output characteristics of flexible FETs based on **PNBDO-T**.

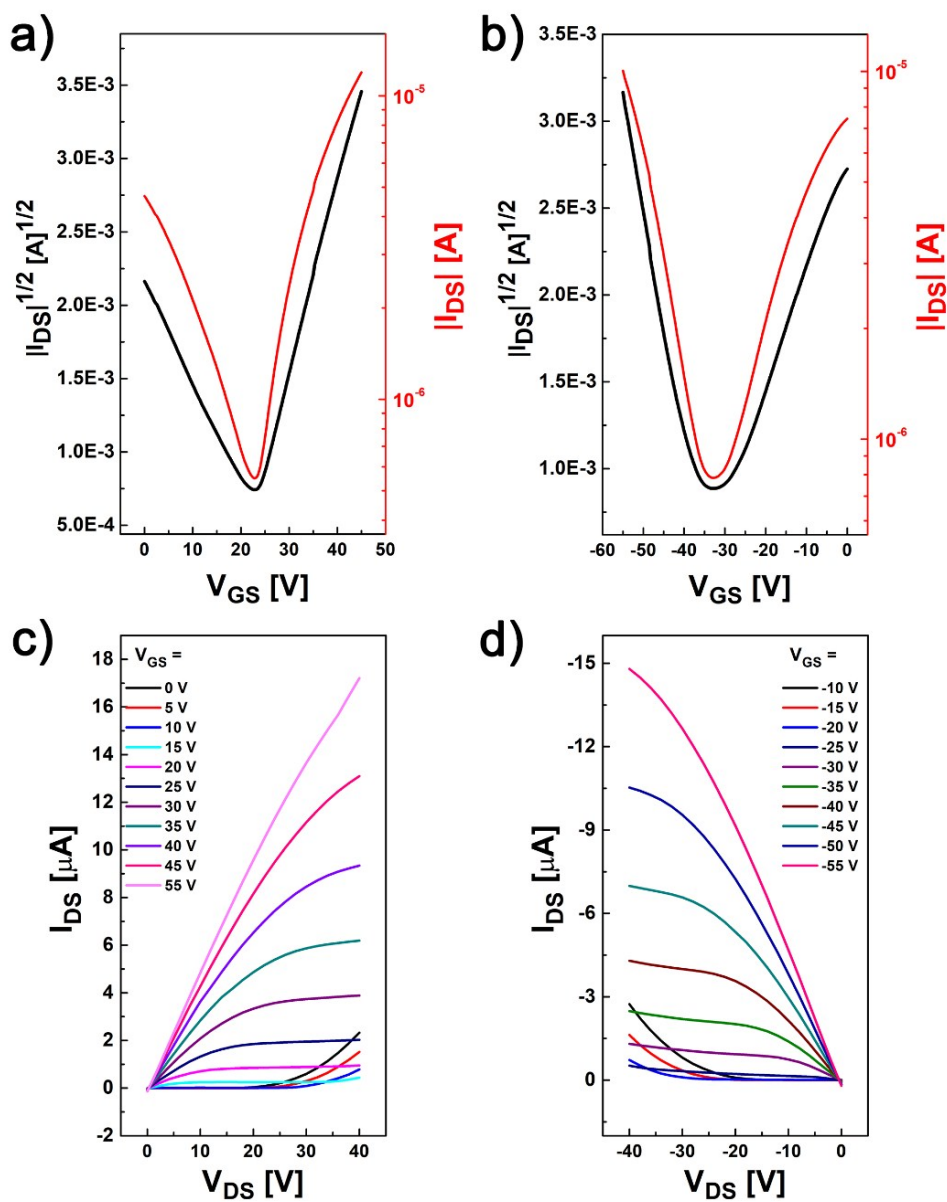

**Fig. S6** Transfer characteristics ( $V_{DS} = -40$  and  $40$  V) and output characteristics of flexible FETs based on PNBDO-TriT.

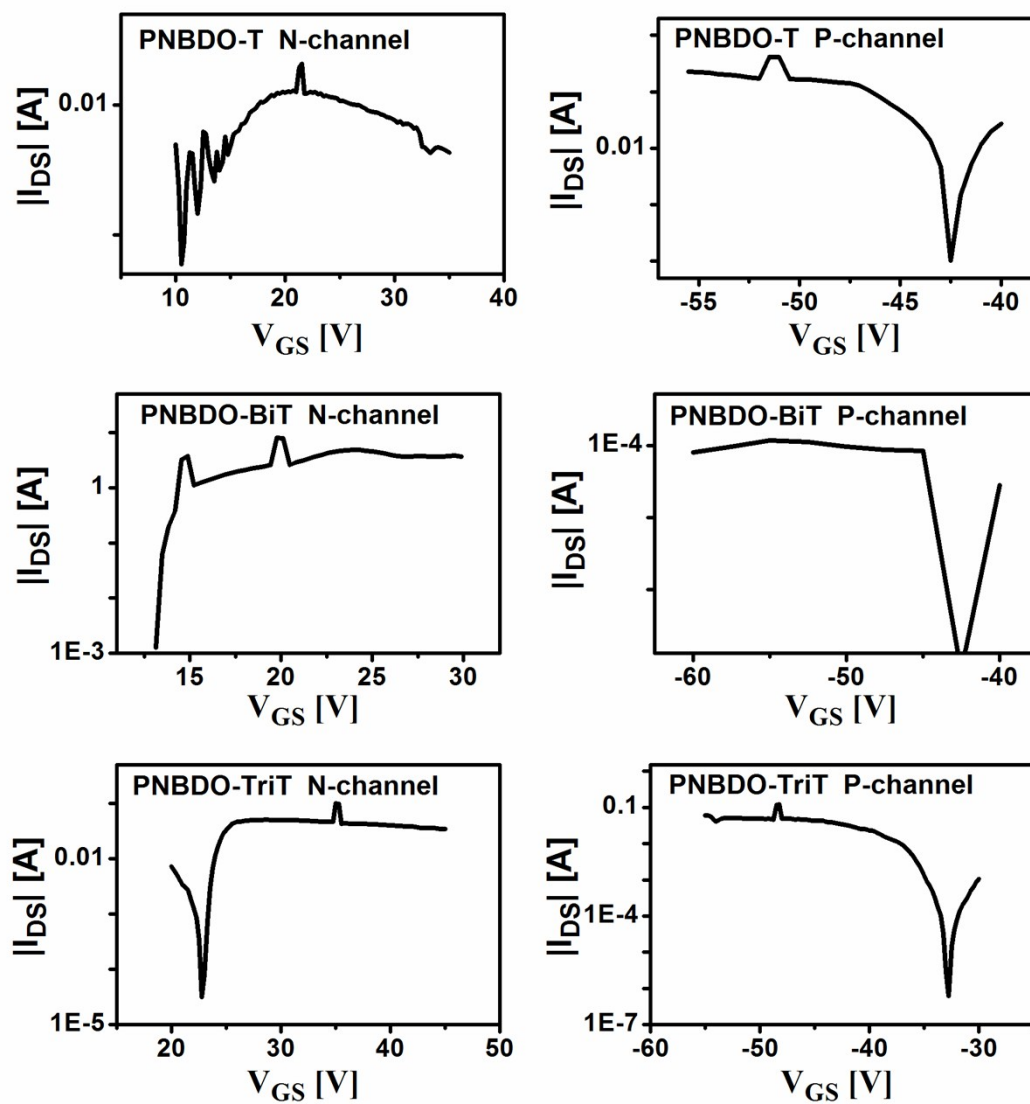

**Fig. S7** Mobility versus gate voltage characteristics.



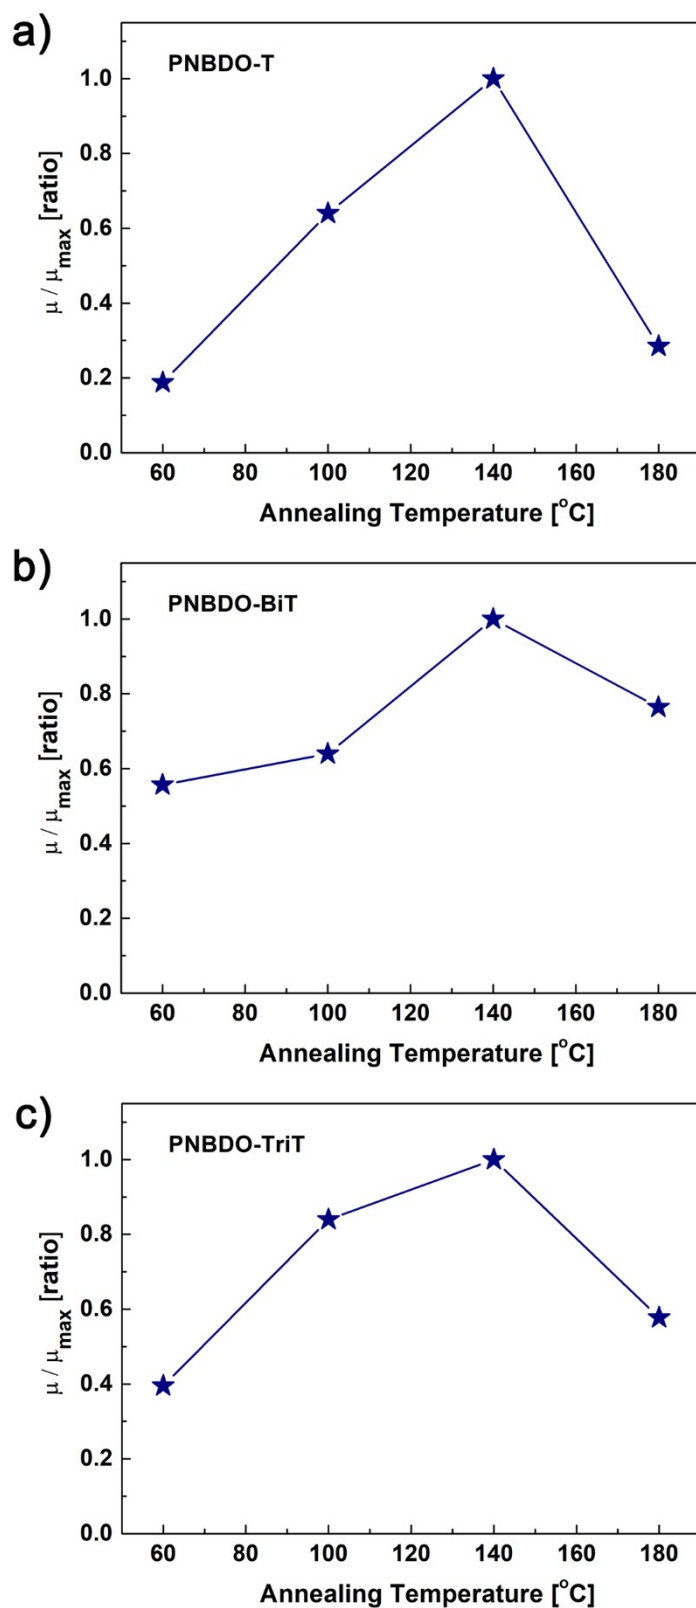

**Fig. S8** Normalized annealing temperature-dependent electron mobilities of (a) PNBDO-T-, (b) PNBDO-BiT-, and (c) PNBDO-TriT-based FETs.

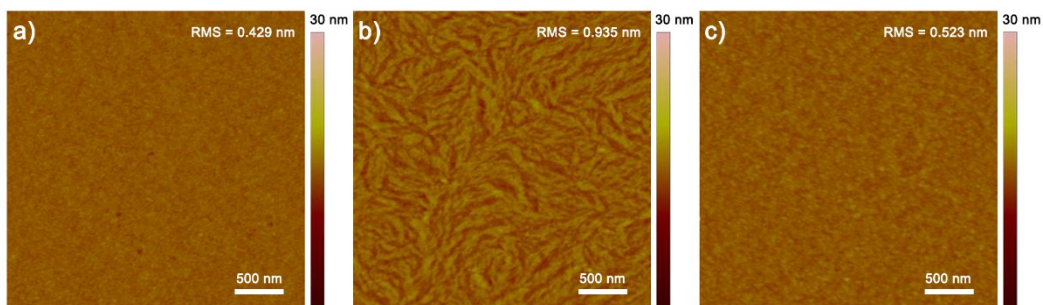

**Fig. S9** AFM height images of the as-spun polymer thin films spin-coated on PET substrate, (a) **PNBDO-T**, (b) **PNBDO-BiT**, and (c) **PNBDO-TriT** ( $3 \mu\text{m} \times 3 \mu\text{m}$ ).

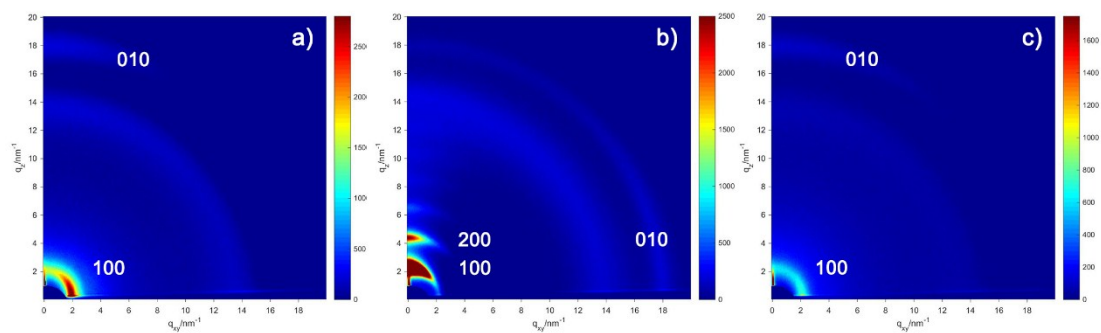

**Fig. S10** 2D-GIXRD diffraction pattern of the as-spun polymer thin films spin-coated on  $\text{SiO}_2/\text{Si}$  substrate, (a) **PNBDO-T**, (b) **PNBDO-BiT**, and (c) **PNBDO-TriT**.

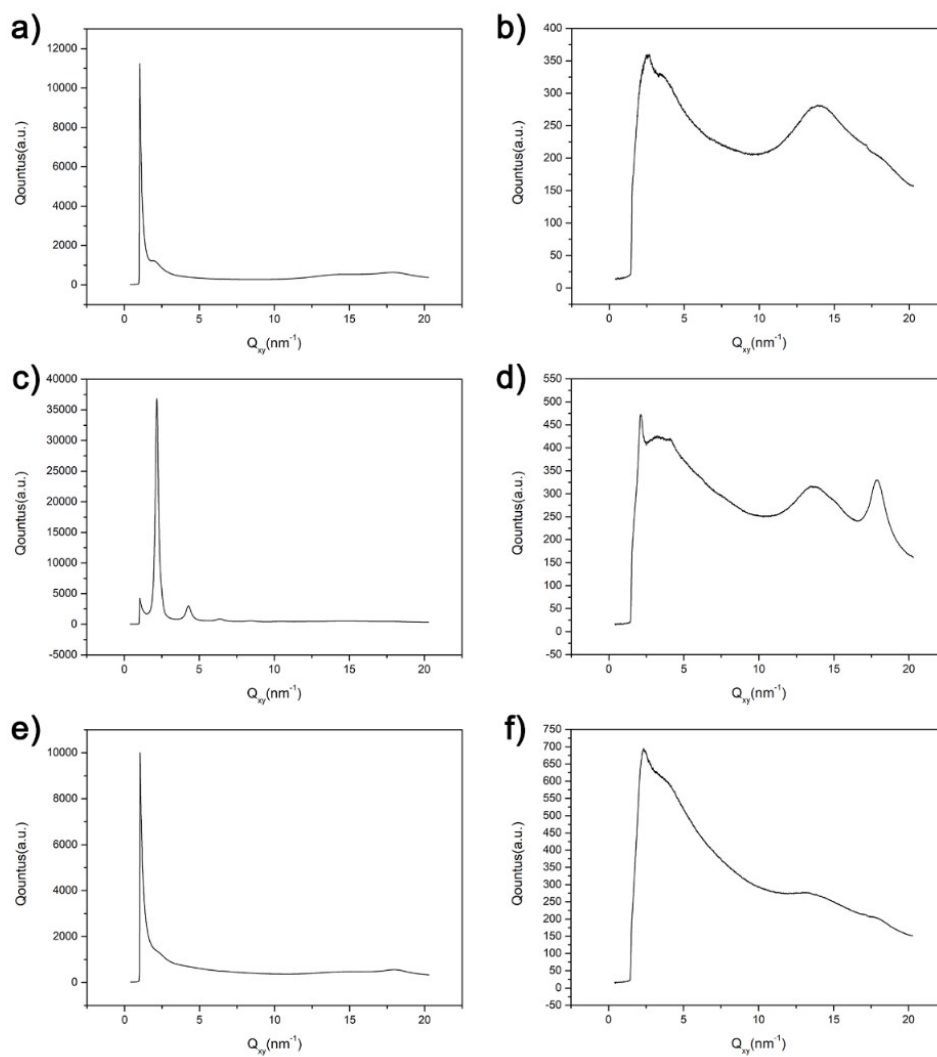

**Fig. S11** 1D-GIXRD diffraction pattern of the as-spun polymer thin films spin-coated on SiO<sub>2</sub>/Si substrate: (a, c, and e) out-of-plane and (b, d, and f) in plane, (a, b) **PNBDO-T**, (c, d) **PNBDO-BiT**, and (e, f) **PNBDO-TriT**.

# $^1\text{H}$ and $^{13}\text{C}$ NMR spectra

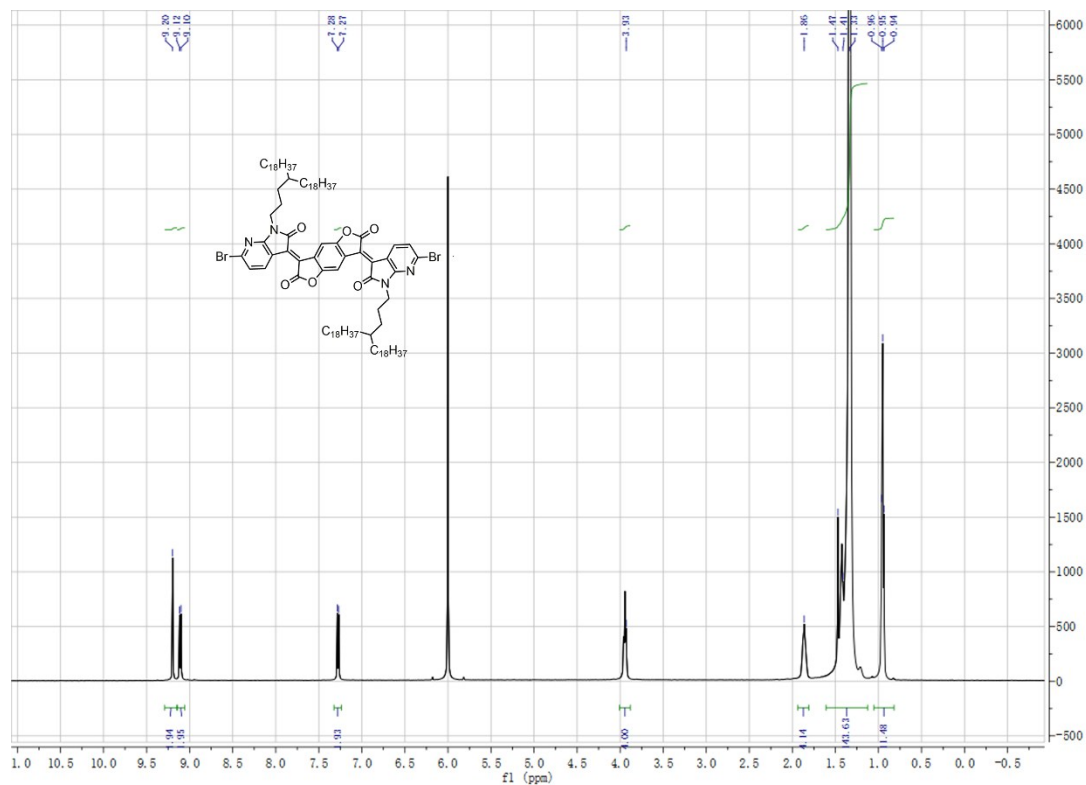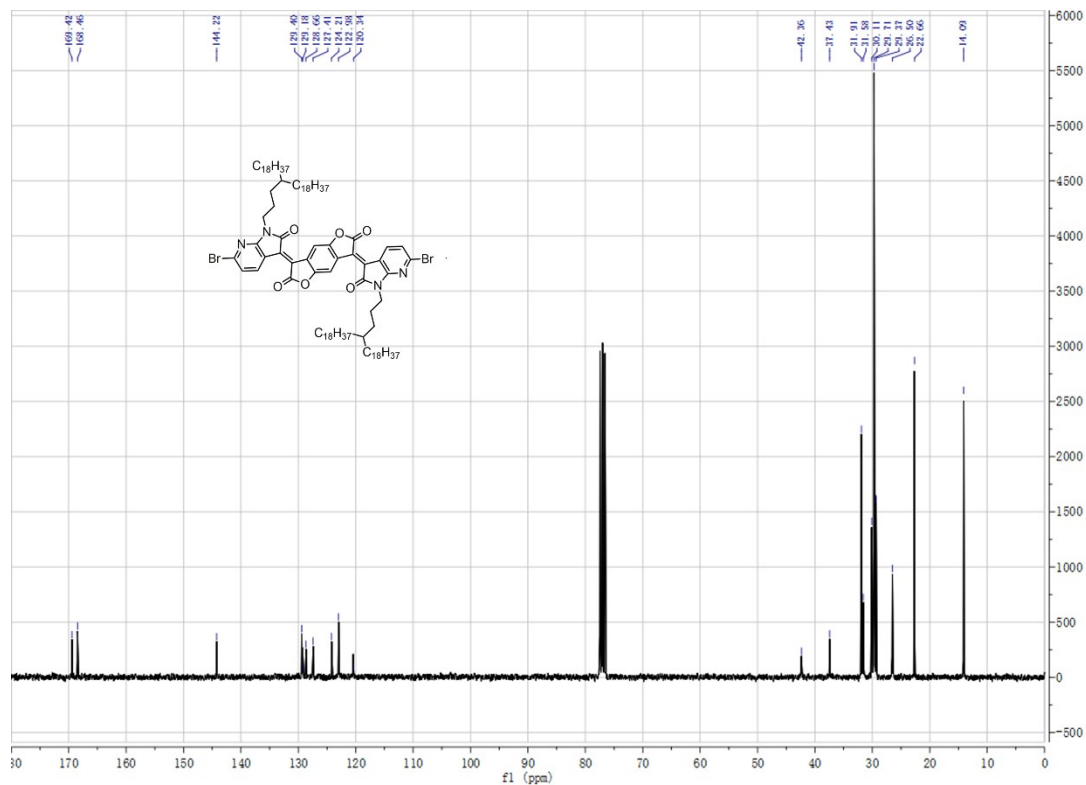

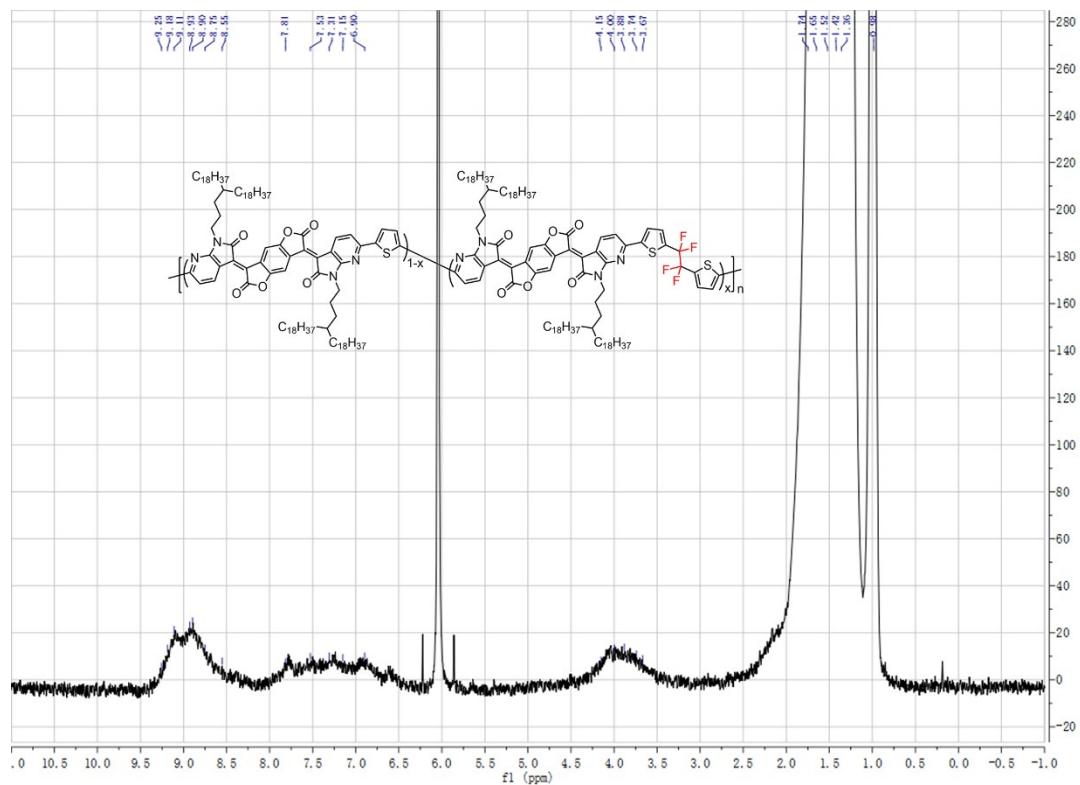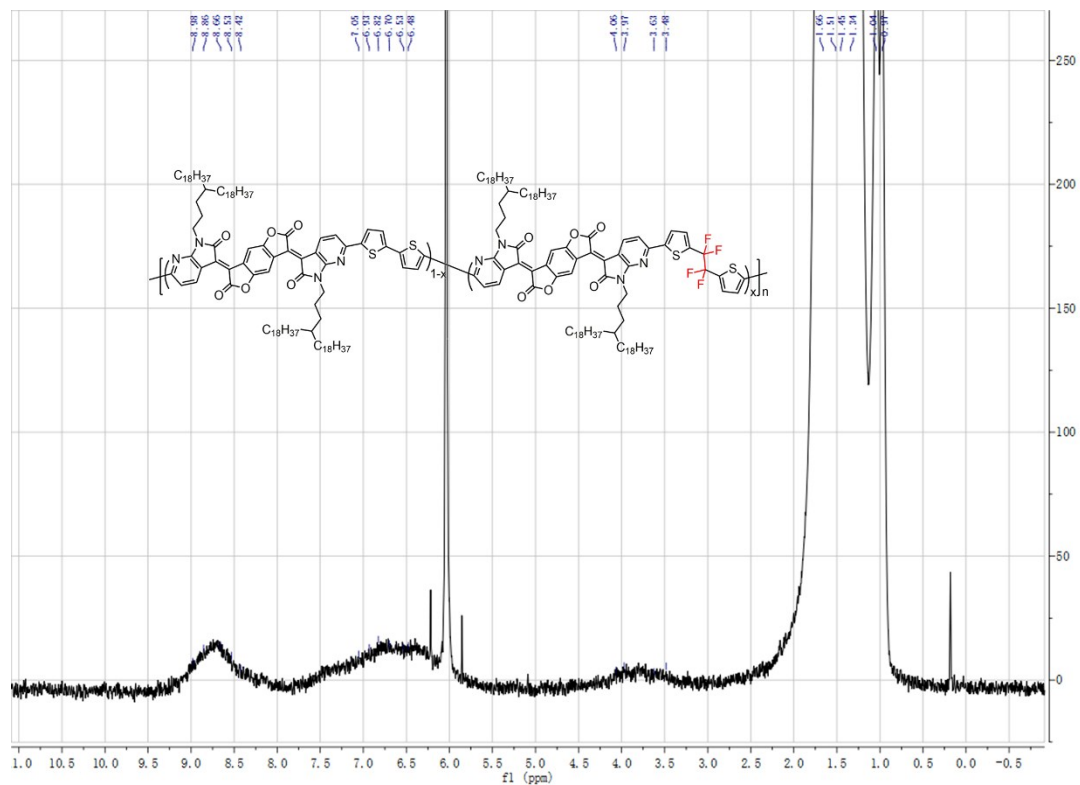

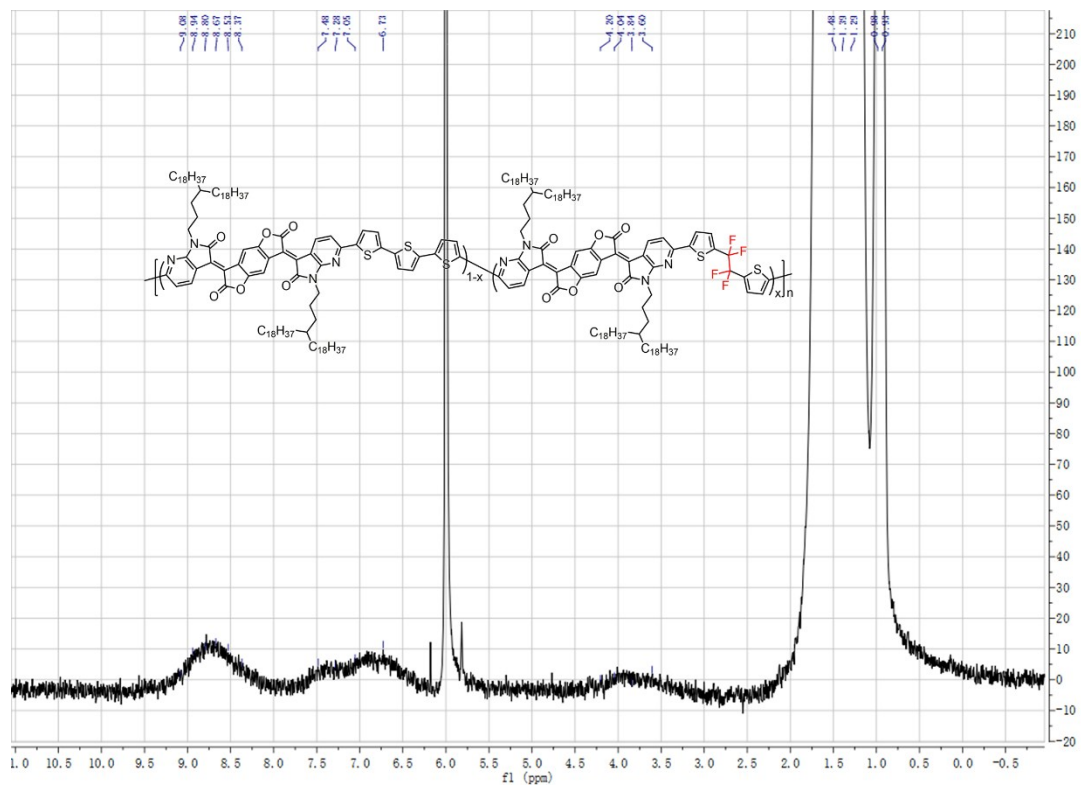

Supplement: d0tc01303j1.pdf [file d0tc01303j1.pdf]
